# Supplementary material
Source: bioRxiv or medRxiv preprint supplement (https://medrxiv.org/highwire/filestream/72690/field_highwire_adjunct_files/2/2020.02.24.20026682-3.pdf)
Supplement: Supplementary file [file 2020.02.24.20026682-3.pdf]

# Baidu Index for Feidian

百度指数

2019-11-27 - 2019-12-08

指数

PC+移动

每日

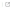

指数

移动端

平均

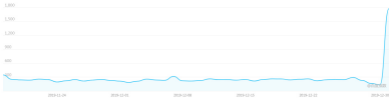

# Baidu Index for SARS

百度指数

2003-11-07 - 2003-12-08

指数

PC+手机

综合

分享

指数

最大值

平均值

5,000

4,000

3,000

2,000

1,000

2003-11-09

2003-11-21

2003-12-03

2003-12-15

2003-12-27

2004-01-08

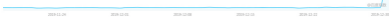

# Baidu Index for coronavirus

2019-11-17 - 2020-01-30

2019-11-17 - 2020-01-30

日线

PC+触屏

默认

分享

2020年

日线

触屏

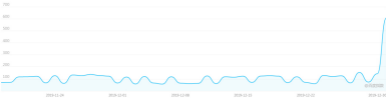

# Baidu Index for novel coronavirus

百度指数

2019-11-17 - 2019-12-18

指数

PC+移动

地区

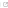

新型冠状病毒

移动端

PC端

1

0.8

0.6

0.4

0.2

2019-12-18

2019-11-14

2019-11-15

2019-11-16

2019-12-05

2019-12-11

2019-12-18

# Baidu Index for pneumonia

百度指数

2019-11-17 - 2020-01-30

百度

PC+移动

默认

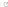

肺炎

实时数据

平均

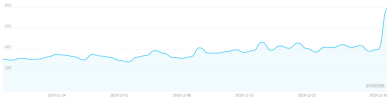

© 2020 Baidu

# Baidu Index for fever

12.35% 12.35%

2018-11-27 ~ 2019-12-08 | 日线 | PC+触屏 | 默认 | 全屏

12.35%

12.35% 12.35%

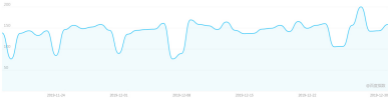

12.35%

# Baidu Index for cough

百度指数

2019-11-17 - 2019-12-30

日线

PC+APP

默认

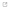

百度

移动端

PC端

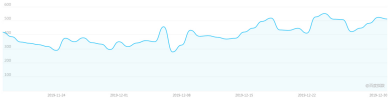

© 2019 Baidu

# Baidu Index for shortness of breath

百度指数

2019-11-17 - 2019-12-08

指数

PC+手机

默认

分享

指数

手机指数

PC指数

150

120

90

60

2019-11-20

2019-12-05

2019-11-08

2019-12-02

2019-12-02

2019-12-08

© 2019 Baidu

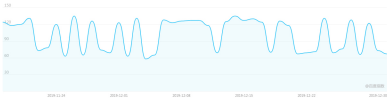



# Baidu Index for dyspnea

百度指数

2018-11-27 - 2019-12-18 | 默认 | PC+手机 | 默认 | 1/1

折线图

最大值 平均值

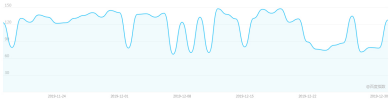

# Baidu Index for stuffy nose

百度指数

2019-11-17 - 2019-12-30 | 百度 | PC+手机 | 默认 | 分享

指数

手机 | PC

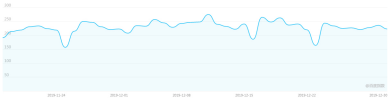

# Baidu Index for runny nose

百度指数

2018-11-27 - 2019-12-18 | 指数 | PC+移动 | 日 | 1

指数

指数 平均

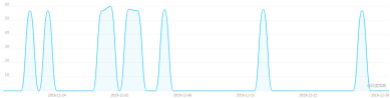

# Baidu Index for fatigue

疲劳

2019-11-17 ~ 2019-12-30

默认

PC+移动

每日

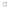

疲劳

最大值 平均值

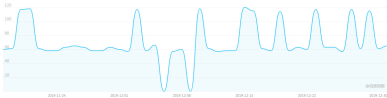

© 2019 Baidu

# Baidu Index for diarrhea

百度指数

2019-11-17 - 2019-12-05 | 默认 | PC+手机 | 默认 | 1/5

指数

实时指数 平均指数

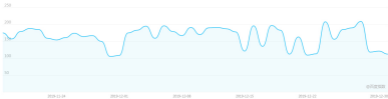

# Baidu Index for infection

百度指数

2019-11-17 - 2019-12-30

百度

PC+移动

默认

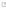

感染

百度指数 百度指数

180

160

140

120

100

80

60

2019-11-29

2019-12-01

2019-12-08

2019-12-15

2019-12-22

2019-12-30

© 2019 Baidu
